# Supplementary material for: α-Tubulin K40 acetylation is required for contact inhibition of proliferation and cell–substrate adhesion
Source: PubMed Central journal article supplement — Mol Biol Cell. 2014 Jun 15;25(12):1854–66. doi: 10.1091/mbc.E13-10-0609 (PMC4055265; doi:10.1091/mbc.e13-10-0609), 2014-06-15
Supplement: supp_E13-10-0609_CombinedSupMats.pdf [file supp_E13-10-0609_CombinedSupMats.pdf]

# Supplemental Materials

*Molecular Biology of the Cell*

Aguilar et al.

### **Supplementary Figure Legends**

**Figure S1.**  $\alpha$ Tat1, the major K40  $\alpha$ -tubulin acetyltransferase *in vivo*, is dispensable for mammalian development and ciliogenesis. (A) Upper: 11 out of the 13 exons of  $\alpha$ Tat1 were replaced by a neo resistance cassette to generate the  $\alpha$ Tat1<sup>-/-</sup> allele. Lower: PCR genotyping of  $\alpha$ Tat1<sup>+/+</sup>,  $\alpha$ Tat1<sup>-/-</sup> and  $\alpha$ Tat1<sup>+/-</sup> mice with primers P1, P2 and P3 indicated in the upper panel. (B) K40 acetylated  $\alpha$ -tubulin immunostaining (green) of adult brain cryosections of  $\alpha$ Tat1<sup>+/+</sup> and  $\alpha$ Tat1<sup>-/-</sup> mice. No K40 acetylated  $\alpha$ -tubulin staining was detected in  $\alpha$ Tat1<sup>-/-</sup> brain sections, especially in the cerebellum and the hippocampus, two regions that show high levels of staining in wild-type animals. ML, molecular layer; PCL, Purkinje cell layer; GCL, granule cell layer; sr, stratum radiatum; sp, stratum pyramidale. (C)  $\alpha$ Tat1<sup>+/+</sup> and  $\alpha$ Tat1<sup>-/-</sup> MEFs, were immunostained for K40 acetylated  $\alpha$ -tubulin (green). Interphase  $\alpha$ Tat1<sup>-/-</sup> MEFs are devoid of K40 acetylated  $\alpha$ -tubulin. (D) Weight curves of two litters (7 pups and 11 pups, respectively). No difference in weight gain was observed between wild-type (black line) or heterozygous (dashed line) and  $\alpha$ Tat1<sup>-/-</sup> (grey line) pups. (E) Hematoxylin and Eosine staining of adult  $\alpha$ Tat1<sup>+/+</sup> and  $\alpha$ Tat1<sup>-/-</sup> brain sagittal sections. Aside from an enlargement of the superior blade of the granular layer in the dentate gyrus (black arrow), the global brain anatomy was conserved in  $\alpha$ Tat1<sup>-/-</sup> mice. (Scale bars: B, 50  $\mu$ m; C, 20  $\mu$ m; E, 1mm (left), 500  $\mu$ m (right)).

**Figure S2.**  $\alpha$ Tat1 is not required for highly acetylated tissues morphogenesis. (A) ZO1 (green), K40 acetylated (red) and detyrosinated (green)  $\alpha$ -tubulin whole mount immunostaining of corneal endothelium. Wild-type corneal endothelial cells present a stereotypical epithelial monolayer organization and a perinuclear ring of acetylated and detyrosinated microtubules (arrows). In  $\alpha$ Tat1<sup>-/-</sup> corneal endothelia, the epithelial organization (hexagonal cell shape, homogeneous cell size, equidistant nuclei spacing) and the presence of the detyrosinated  $\alpha$ -tubulin ring were conserved. (B) Auditory brainstem responses (ABR) and distortion product of otoacoustic emission (DPOAE) thresholds were measured for  $\alpha$ Tat1<sup>-/-</sup> (red, n=3),  $\alpha$ Tat1<sup>+/-</sup> (blue, n= 2)

and wildtype (black, n=1) mice at P28. All tested mice had normal hearing thresholds. Data is presented as mean± SEM. (Scale bars: 30 μm (top), 10 μm (bottom)).

**Figure S3.**  $\alpha$ -tubulin tryrosination/detyrosination cycle, Purkinje cells dendritogenesis and axonal morphology are not affected in the absence of  $\alpha$ Tat1. (A)  $\alpha$ Tat1<sup>+/+</sup> and  $\alpha$ Tat1<sup>-/-</sup> adult brain cryosections were immunostained for tyrosinated (Tyr-Tub, dynamic microtubules) and detyrosinated  $\alpha$ -tubulin (Detyr-Tub, long-lived microtubules). The spatial organization of both types of microtubules, here shown in the cerebellar cortex and the hippocampus, was conserved in the  $\alpha$ Tat1<sup>-/-</sup> mice. In particular, the cytoskeletal architecture of the cerebellar Bergman glia, labeled with glial fibrillary acidic protein (GFAP) and S100 $\beta$  (red), was unchanged in the  $\alpha$ Tat1 deficient cerebellum. ML, molecular layer; PCL, Purkinje cell layer; GCL, granule cell layer; so = stratum oriens, sp = stratum pyramidale, sr stratum radiatum, CA, cornu ammonis. (B) Polyglutamylated  $\alpha$ -tubulin immunostaining (GT335 antibody, green) of  $\alpha$ Tat1<sup>+/+</sup> and  $\alpha$ Tat1<sup>-/-</sup> adult brain cryosections. The organization of the dendritic tree of the Purkinje cells is conserved in the  $\alpha$ Tat1<sup>-/-</sup> cerebellum. In the corpus callosum, the polyglutamylated  $\alpha$ -tubulin staining (white) shows the absence of morphological defects in axonal tracts and individual axons (arrows) in  $\alpha$ Tat1-deficient mice. (Scale bars: A, 50 μm (cerebellum, hippocampus bottom), 100 μm (hippocampus top); B, 20 μm (cerebellum), 10 μm (corpus callosum)).

**Figure S4.**  $\alpha$ Tat1 is required for contact inhibition. (A)  $\alpha$ Tat1<sup>+/+</sup>,  $\alpha$ Tat1<sup>-/-</sup> and  $\alpha$ Tat1<sup>-/-</sup> cells expressing GFP, GFP- $\alpha$ TAT1 or GFP- $\alpha$ TAT1[D157N] were seeded at 15,000 cells/cm<sup>2</sup>. The day after seeding, cells were fixed, immunostained for ZO-1 (red) and imaged in a Z-stack. Nuclei were labeled with Hoechst (blue). (B) K40 acetylated  $\alpha$ -tubulin (red) and GFP (green) immunostaining of all studied cell lines ( $\alpha$ Tat1<sup>+/+</sup>,  $\alpha$ Tat1<sup>-/-</sup> and  $\alpha$ Tat1<sup>-/-</sup> cells expressing GFP, GFP- $\alpha$ TAT1 or GFP- $\alpha$ TAT1[D157N]). Only GFP- $\alpha$ TAT1 restores K40  $\alpha$ -tubulin acetylation to near wild-type levels. (C) WT and  $\alpha$ Tat1<sup>-/-</sup> cells were seeded at low density in order to assess Merlin localization in cells that do not contact any other cell and stained for Merlin (green), total (red) and acetylated (white)  $\alpha$ - tubulin. (D)  $\alpha$ Tat1<sup>-/-</sup> cells expressing GFP (red), GFP- $\alpha$ TAT1 (blue) or GFP- $\alpha$ TAT1[D157N] (orange) were analyzed by flow cytometry to assess their relative size. Histogram shows the forward scatter (FSC-A) for each cell line. (Scale bars: B, 20 μm, C, 10 μm).

**Figure S5.**  $\alpha$ Tat1 is required for cell adhesion. Shorter exposure and larger pictures of the experiment shown in Figure 4D.  $\alpha$ Tat1<sup>+/+</sup> and  $\alpha$ Tat1<sup>-/-</sup> cells were treated with nocodazole or blebbistatin and immunostained for  $\alpha$ -tubulin (red). Actin was labeled using Alexa488-Phalloidin (green). While nocodazole treatment stimulates fiber stress formation in wild-type cells, no or few stress fibers were observed in  $\alpha$ Tat1<sup>-/-</sup> cells, which rounded up and detached. In blebbistatin-treated wild-type cells, the inhibition of myosin II function induces cytoplasmic collapse. In  $\alpha$ Tat1<sup>-/-</sup> cells, blebbistatin treatment did not yield any major morphological alteration. (Scale bar: 30  $\mu$ m)

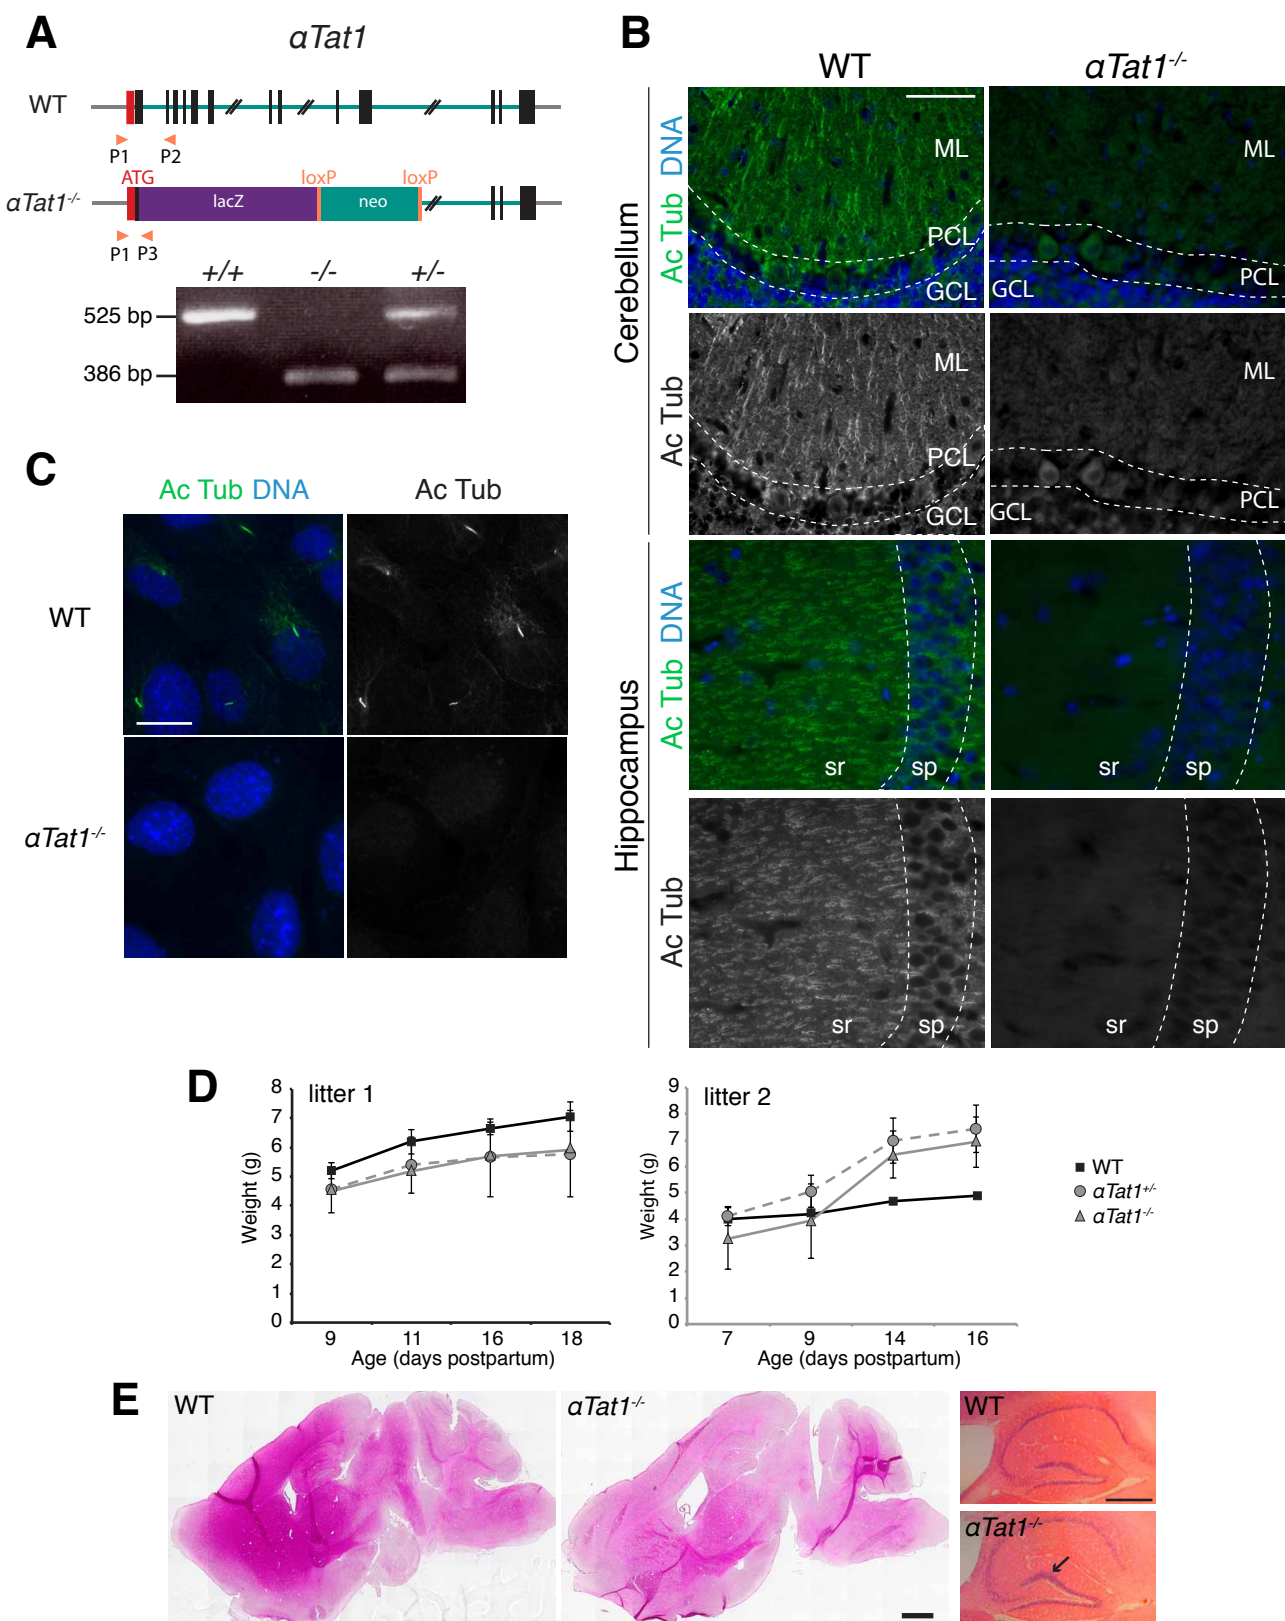

**A**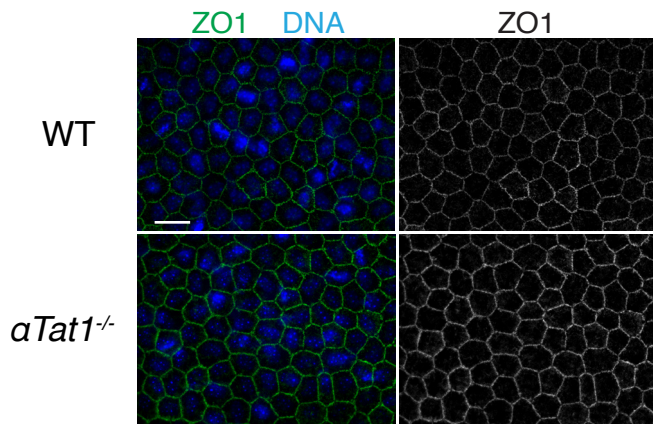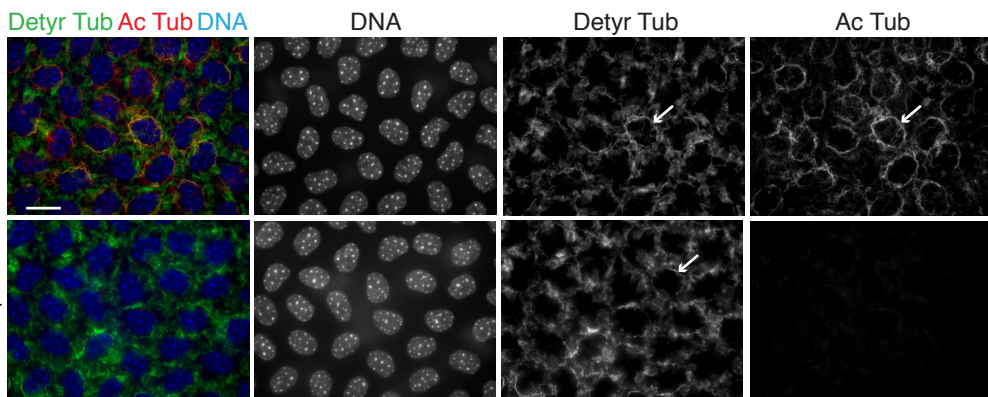**B**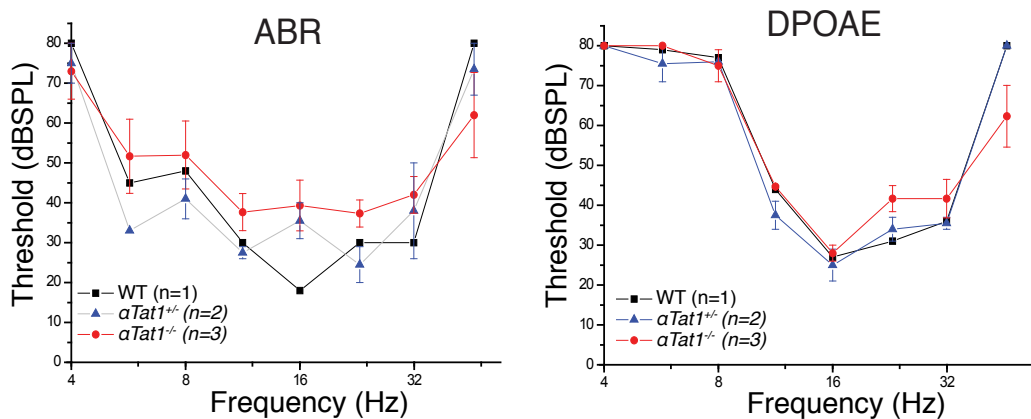

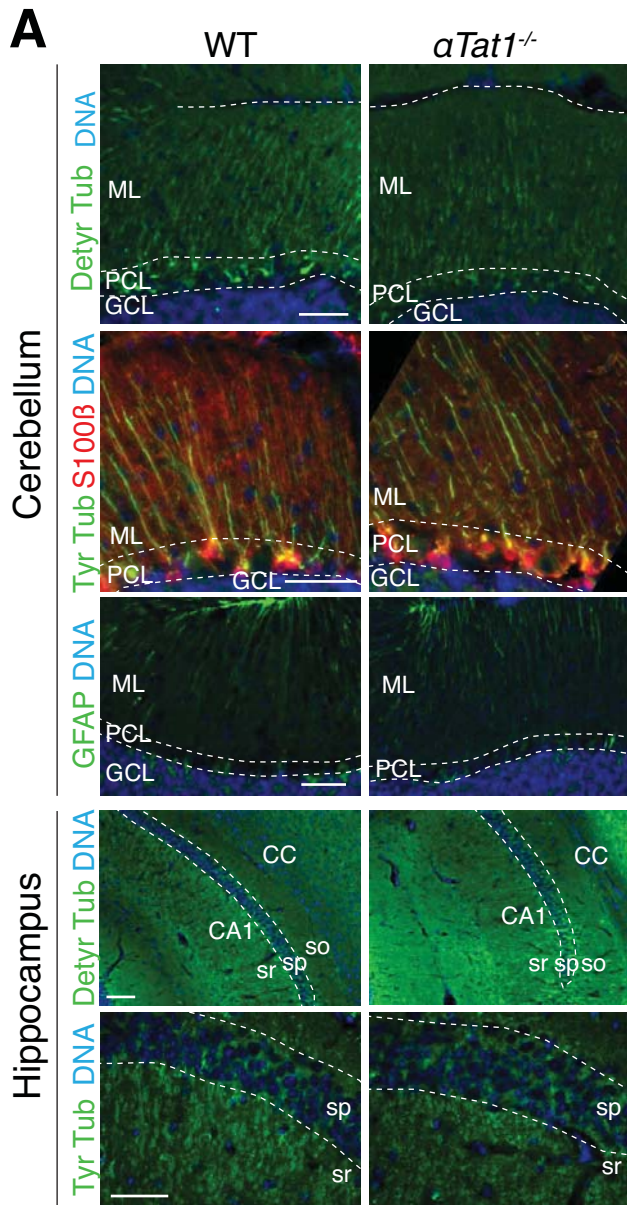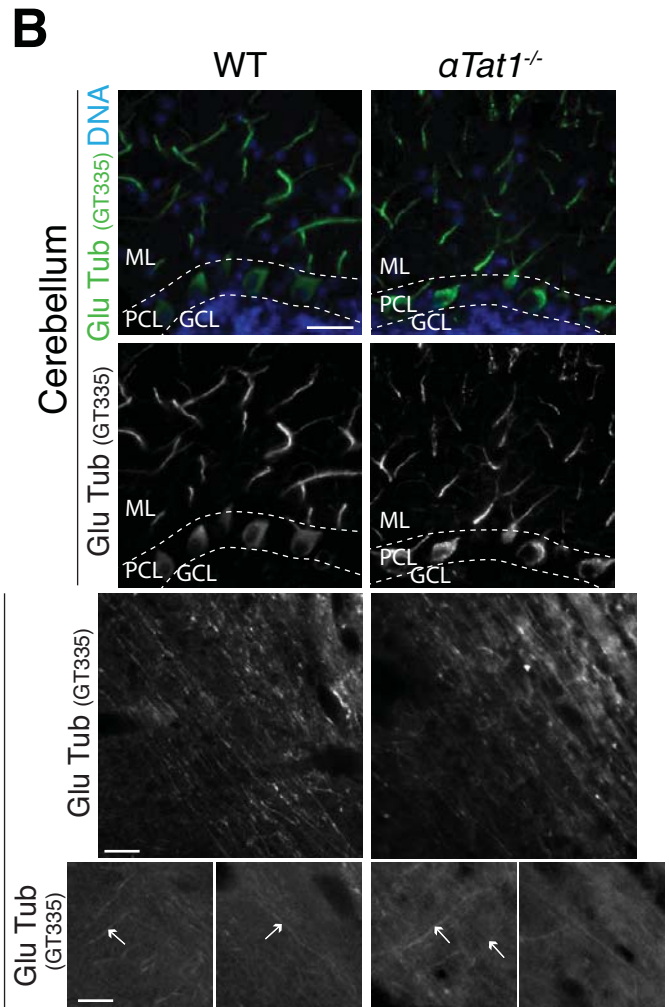

Aguilar et al., Figure S3

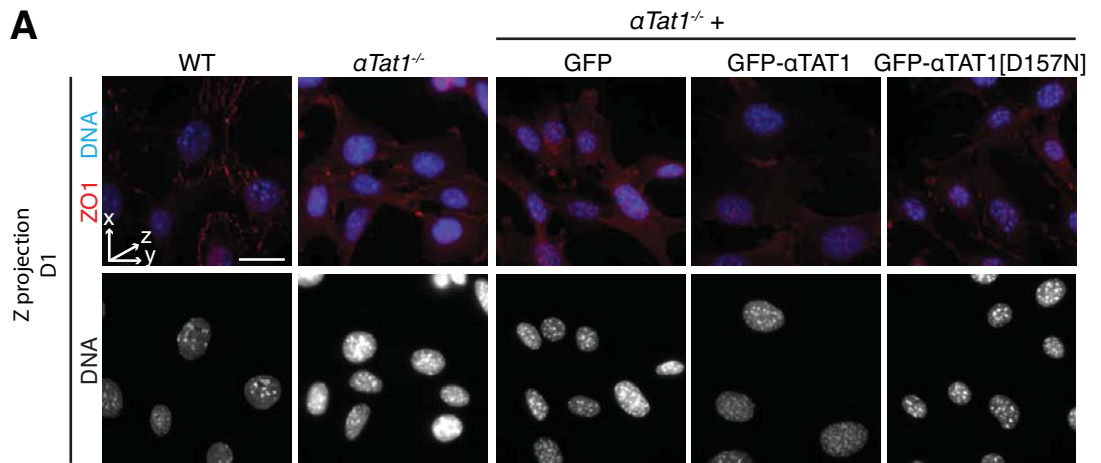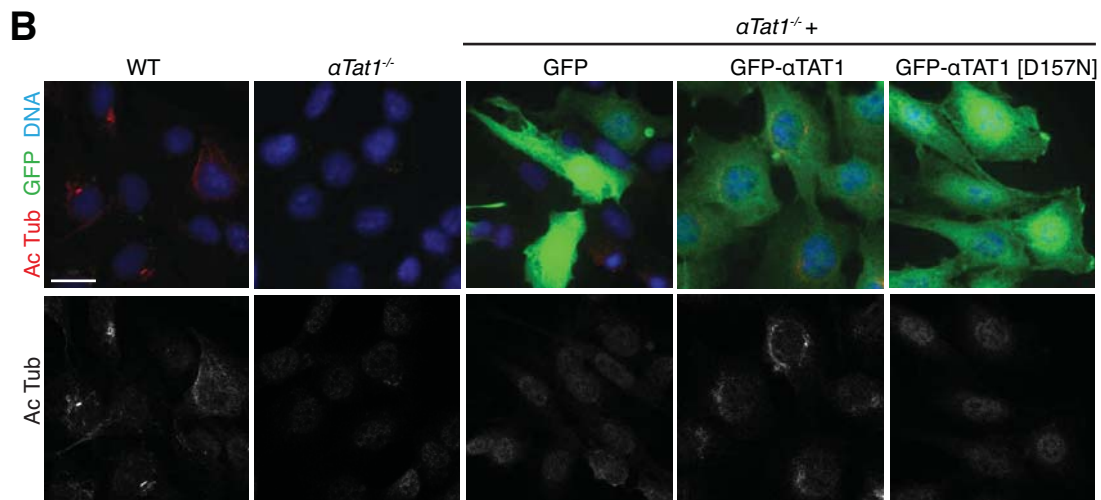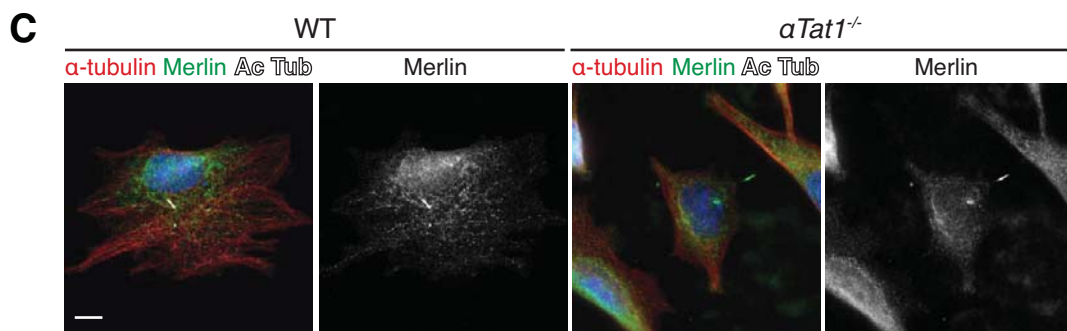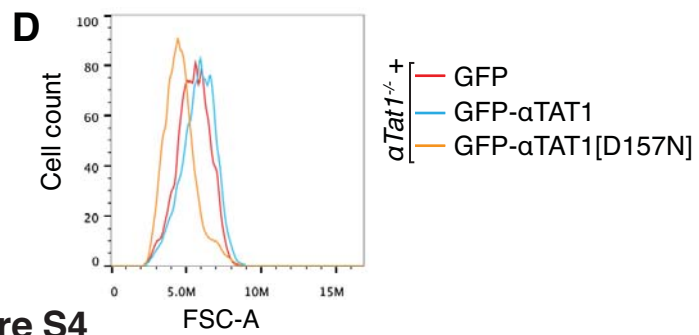

Aguilar et al., Figure S4



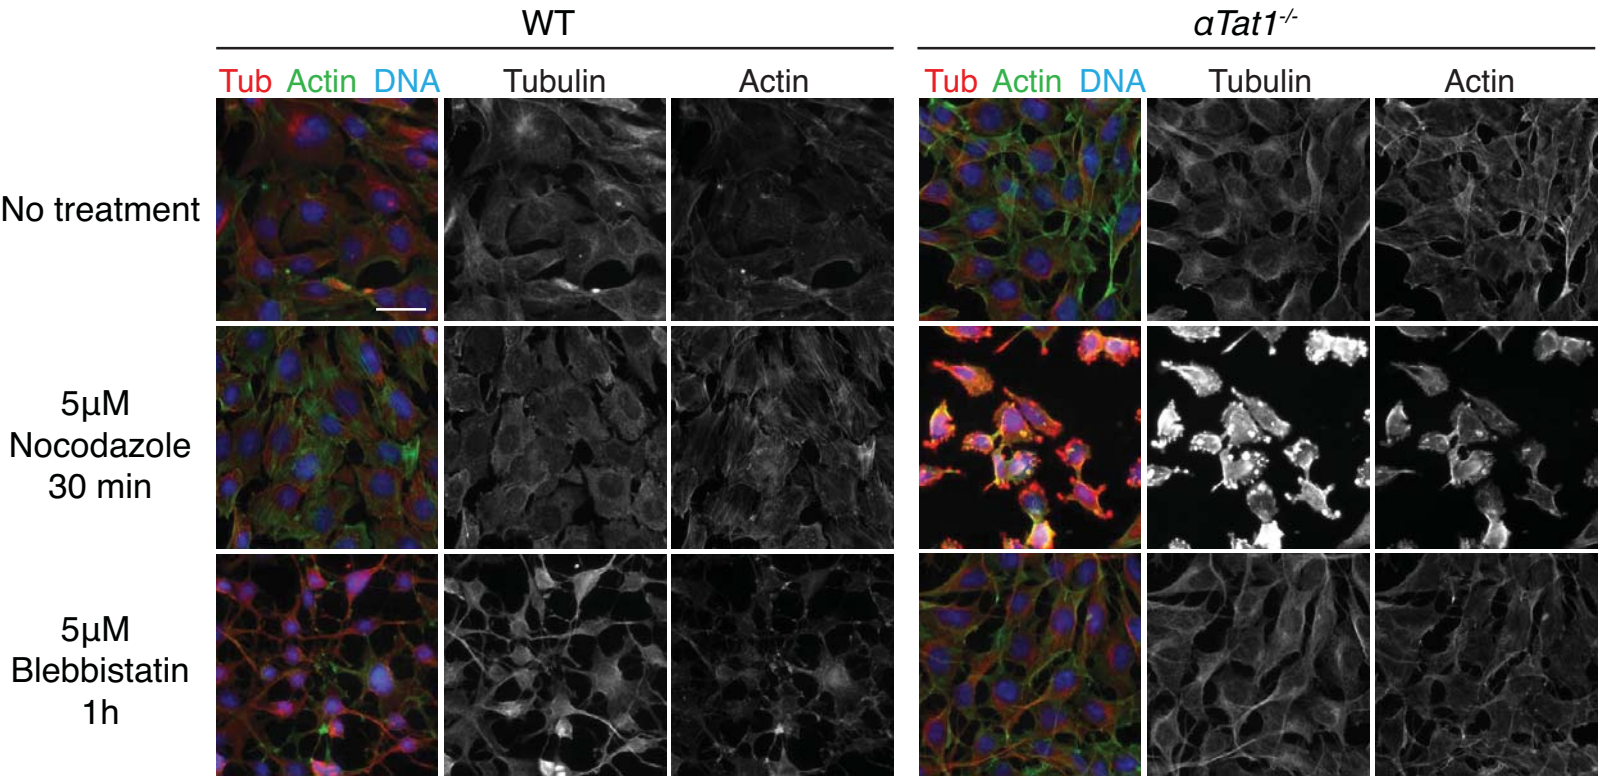

Aguilar et al., Figure S5
